# Supplementary material
Source: MDPI journal article supplement (https://www.mdpi.com/2673-9976/16/1/31)
Supplement: s1 [file s1]

**IECHo  
2022**

**1st International Electronic Conference  
on Horticulturae**  
16–30 April 2022 | ONLINE

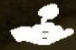

*horticulturae*

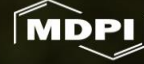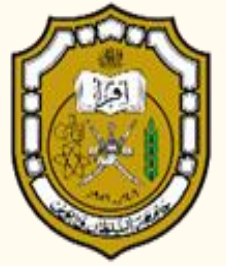

**جامعة السلطان قابوس**  
Sultan Qaboos University

Speaking at:

# The contribution of impact damage to the quality changes of stored banana fruits

Mai Al-Dairi\* and Pankaj B. Pathare  
Sultan Qaboos University  
Oman

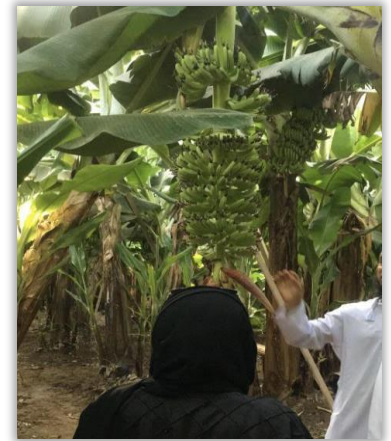

# Outline

---

**Introduction**

**1**

**Methodology**

**2**

**Results &  
Discussion**

**3**

**Conclusions &  
Recommendations**

**4**

**Acknowledgments**

**5**

**References**

**6**

# Introduction

## Background

---

**01**

Mechanical damage in fresh produce is the main cause of quality damage and many other postharvest losses during the stages of handling, transporting, and storage

(Pathare and Al-Dairi, 2021).

**02**

Bruising that primarily occurs during handling and other postharvest processes is the most prevalent type of mechanical damage for most fresh produce

(Opara and Pathare, 2014).

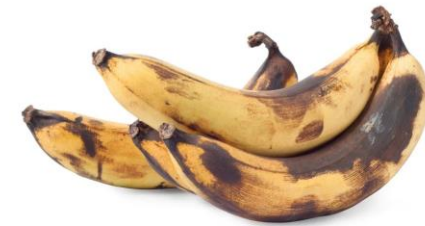

# Introduction Cont.

## Background

---

**03**

Impact damage can occur when fruits fall with a particular and sufficient force against another fruit or surface

(Htike et al. 2021).

**04**

Bruising can affect the internal and external attributes of fruits and can alter the physiological and metabolic processes and increase postharvest decay

(Fadiji et al. 2016).

**05**

Banana is a climacteric perishable fruit, making it highly prone to postharvest losses during postharvest handling and transportation

(Wasala et al. 2014).

# Introduction Cont.

## Objective & Novelty

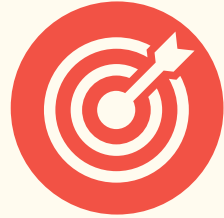

### Objective

To evaluate the local banana quality changes affected by **three impact energies** (low, medium, and high) resulting from the simulated handling practices during storage at **three different temperature conditions** (5, 10, and 22°C) for **12 days**.

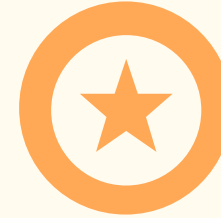

### Novelty

There is a dearth of information related to the effect of bruising on banana fruits. Therefore, this study evaluated the effect of simulated handling practices on the mechanical damage of bananas by a pendulum technique.

# Methodology

## Experimental setup

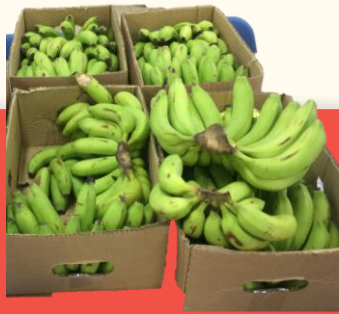

### Sample preparation

Banana (cv. Malindi)  
Muscat, Oman

01

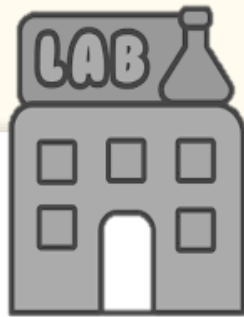

### Laboratory

Postharvest Technology  
Laboratory at Sultan  
Qaboos University.

02

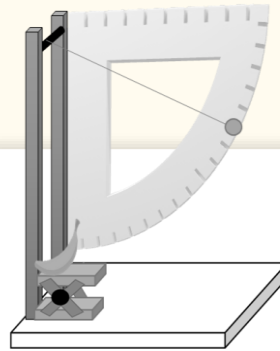

### Simulated impact test

Pendulum test

03

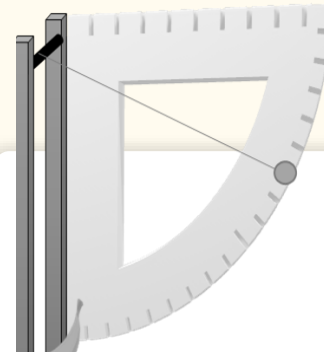

### Impact level

30° - Low (0.07 J)  
45° - Med. (0.160 J)  
60° - High (0.270 J)

04

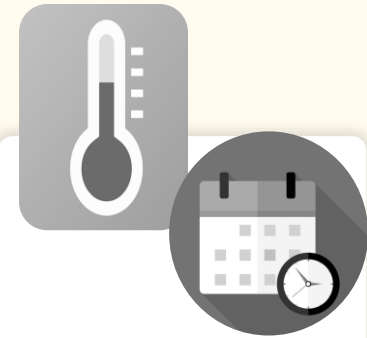

### Storage temp. & duration

- 5°C, 13°C & 22°C  
- For 12 days.

05

# Methodology Cont.

## Experimental setup

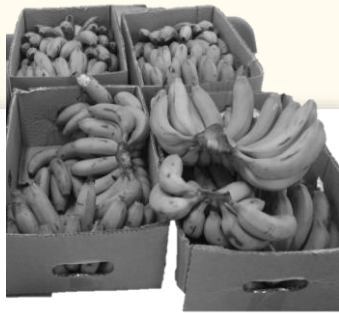

### Sample preparation

Banana (cv. Malindi)  
Muscat, Oman

01

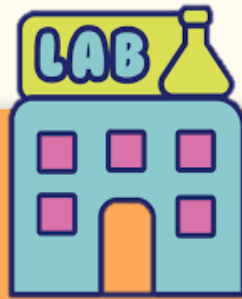

### Laboratory

Postharvest Technology  
Laboratory at Sultan  
Qaboos University.

02

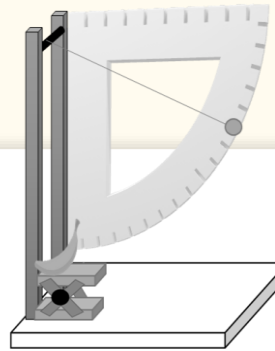

### Simulated impact test

Pendulum test

03

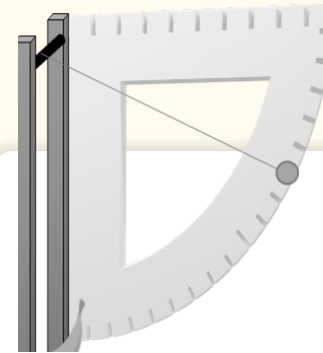

### Impact level

30°- Low (0.07 J)  
45°- Med. (0.160 J)  
60°- High (0.270 J)

04

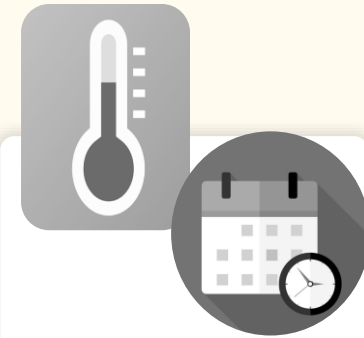

### Storage temp. & duration

- 5°C, 13°C & 22°C  
- For 12 days.

05

# Methodology Cont.

## Experimental setup

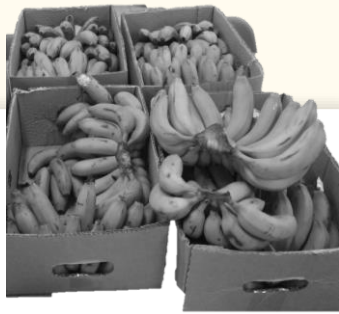

### Sample preparation

Banana (cv. Malindi)  
Muscat, Oman

01

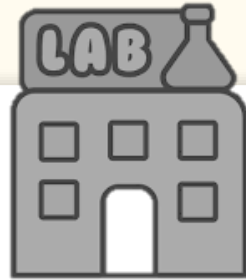

### Laboratory

Postharvest Technology  
Laboratory at Sultan  
Qaboos University.

02

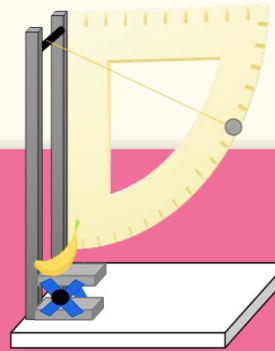

### Simulated impact test

Pendulum test

03

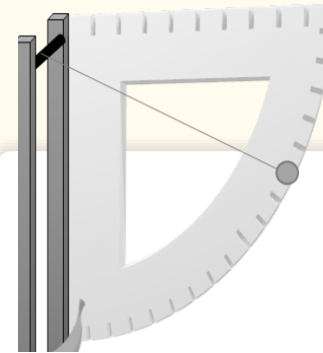

### Impact level

30°- Low (0.07 J)  
45°- Med. (0.160 J)  
60°- High (0.270 J)

04

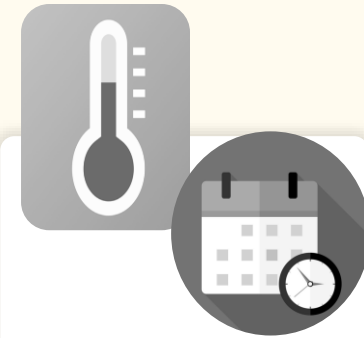

### Storage temp. & duration

- 5°C, 13°C & 22°C  
- For 12 days.

05



# Methodology Cont.

## Experimental setup



### Sample preparation

Banana (cv. Malindi)  
Muscat, Oman

01



### Laboratory

Postharvest Technology  
Laboratory at Sultan  
Qaboos University.

02



### Simulated impact test

Pendulum test

03

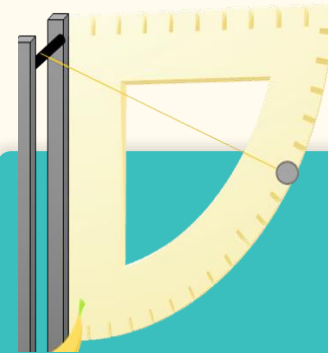

### Impact level

30° - Low (0.07 J)  
45° - Med. (0.160 J)  
60° - High (0.270 J)

04

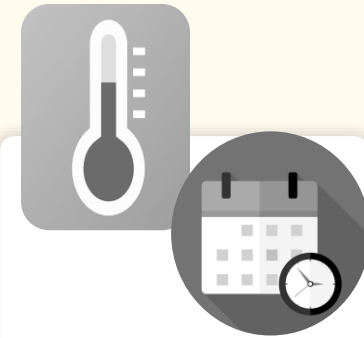

### Storage temp. & duration

- 5°C, 13°C & 22°C  
- For 12 days.

05

# Methodology Cont.

## Experimental setup

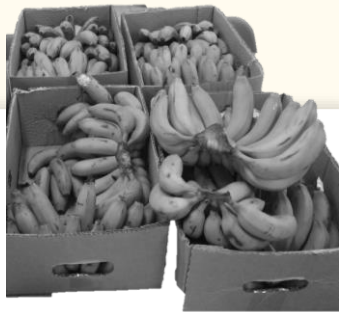

### Sample preparation

Banana (cv. Malindi)  
Muscat, Oman

01



### Laboratory

Postharvest Technology  
Laboratory at Sultan  
Qaboos University.

02



### Simulated impact test

Pendulum test

03

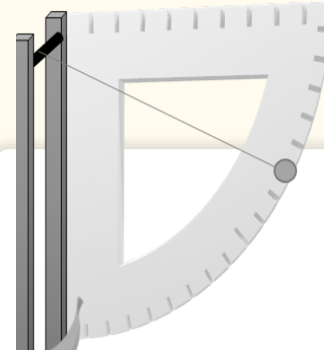

### Impact level

30°- Low (0.07 J)  
45°- Med. (0.160 J)  
60°- High (0.270 J)

04

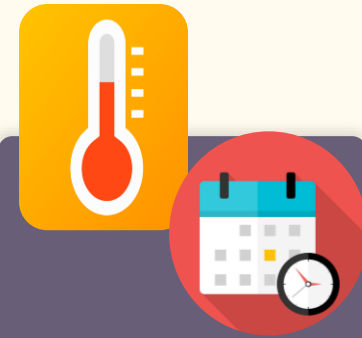

### Storage temp. & duration

- 5°C, 13°C & 22°C
- For 12 days.

05

# Methodology Cont.

## Quality measurements and statistical analysis

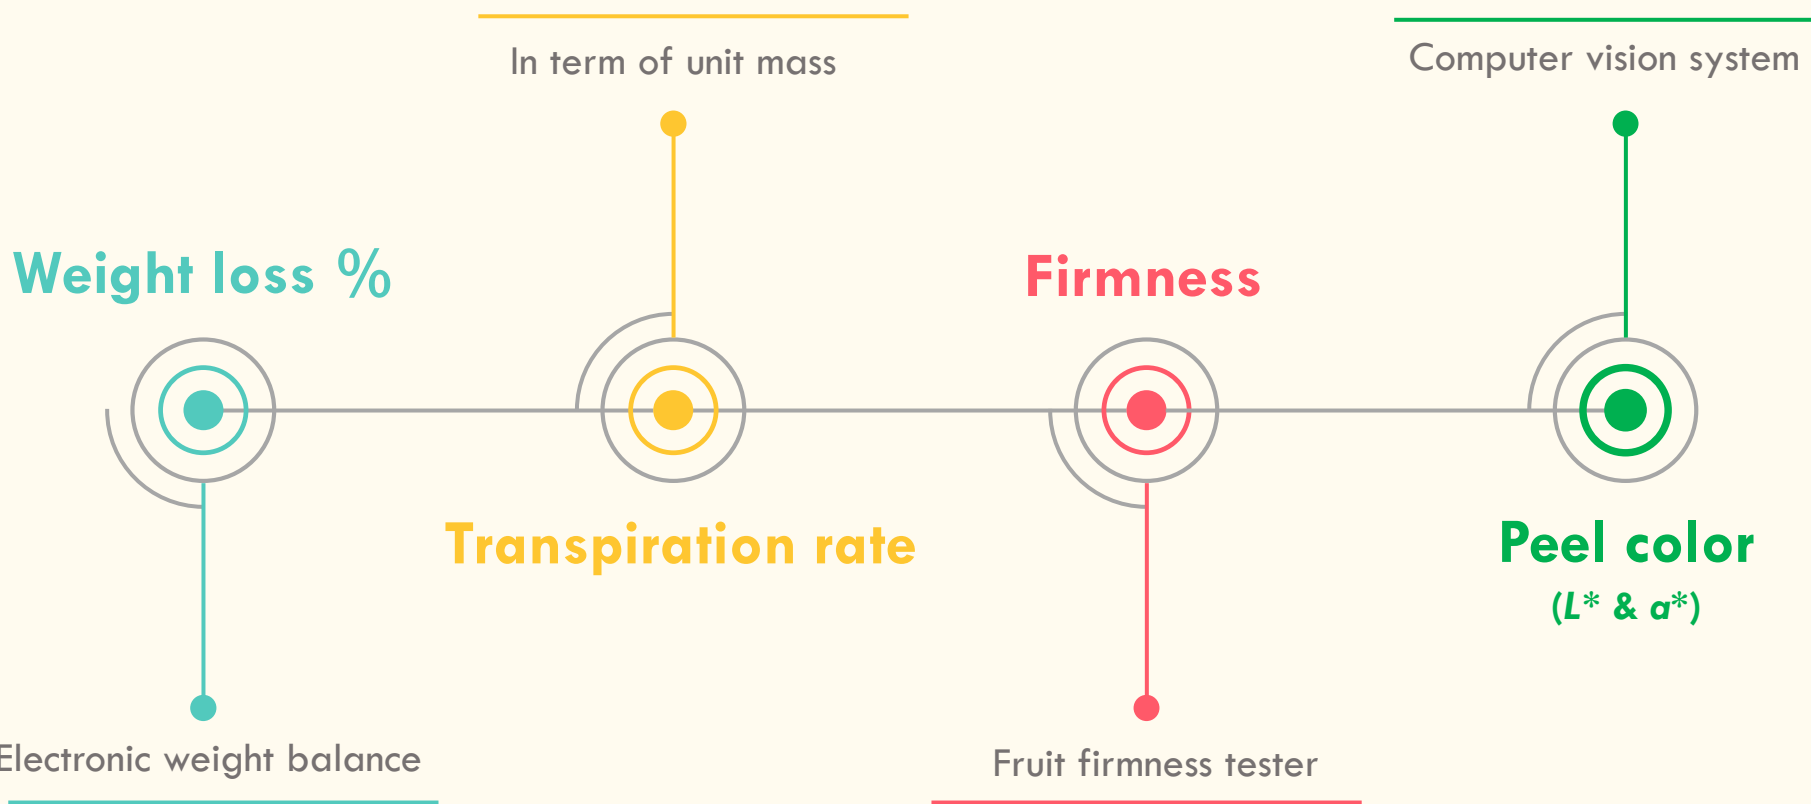

Statistical analysis  
3-Way Analysis  
of Variance

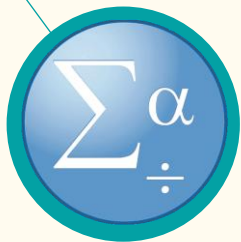

$\alpha^*$

$L^*$

Firmness

TRm

WL%

## Results & Discussion

---

# Results & Discussion Cont.

## Weight loss %

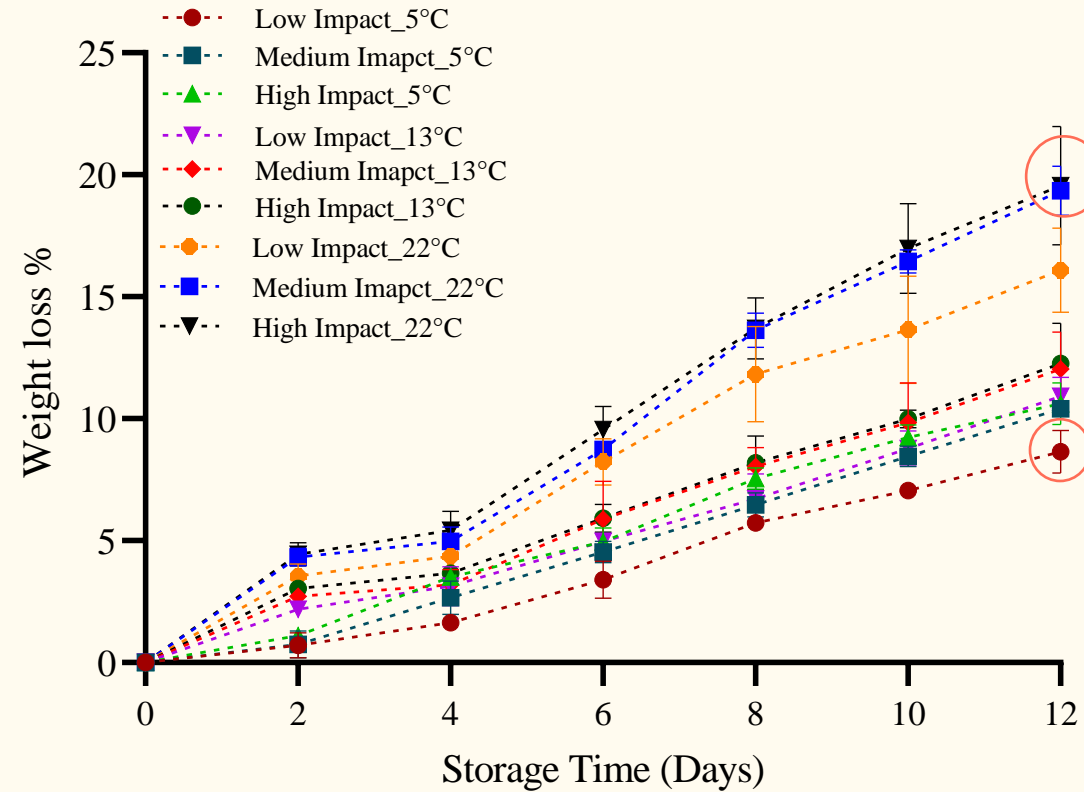

**Figure 1.** Weight loss % of banana fruit bruised at low, medium, and high impact energy levels and stored 5°C, 13°C and 22°C storage conditions for 12 days. Error bars represent standard deviation (SD) of the mean values  $\pm$ S.D. of 3 replicates.

# Results and Discussion Cont.

## Transpiration rate, TRm ( $\text{mg kg}^{-1} \text{s}^{-1}$ )

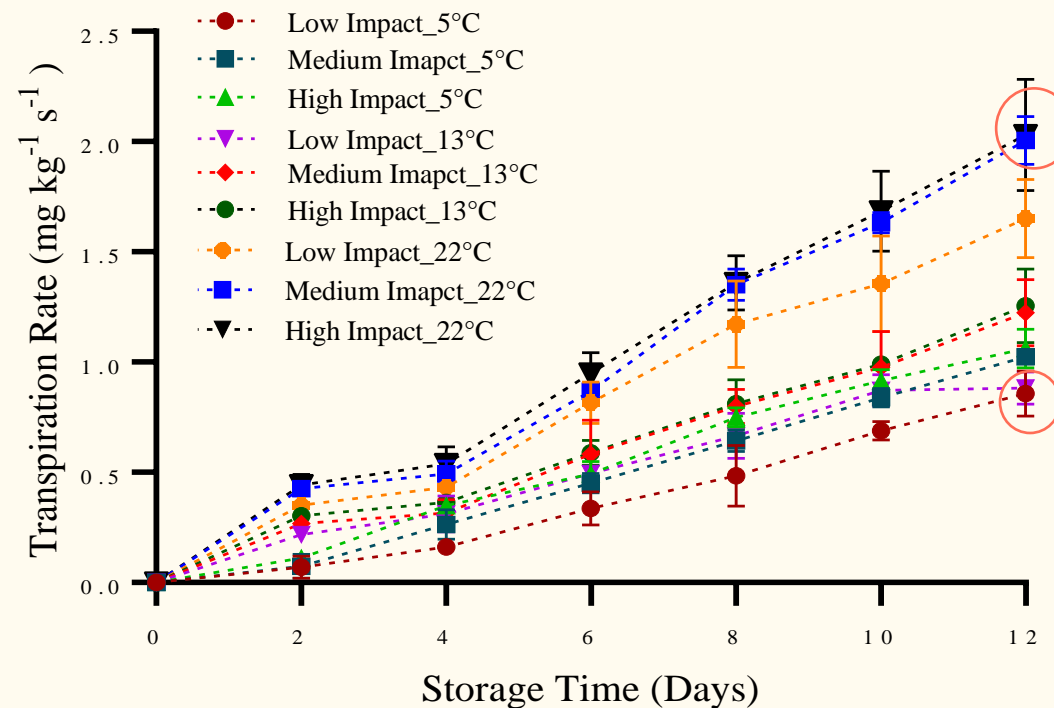

**Figure 2.** Transpiration rate  $\text{mg kg}^{-1} \text{s}^{-1}$  of banana fruit bruised at low, medium, and high impact energy levels and stored 5°C, 13°C and 22°C storage conditions for 12 days. Error bars represent standard deviation (SD) of the mean values  $\pm$ S.D. of 3 replicates.

TRm

WL%

# Results and Discussion Cont.

## Firmness (N)

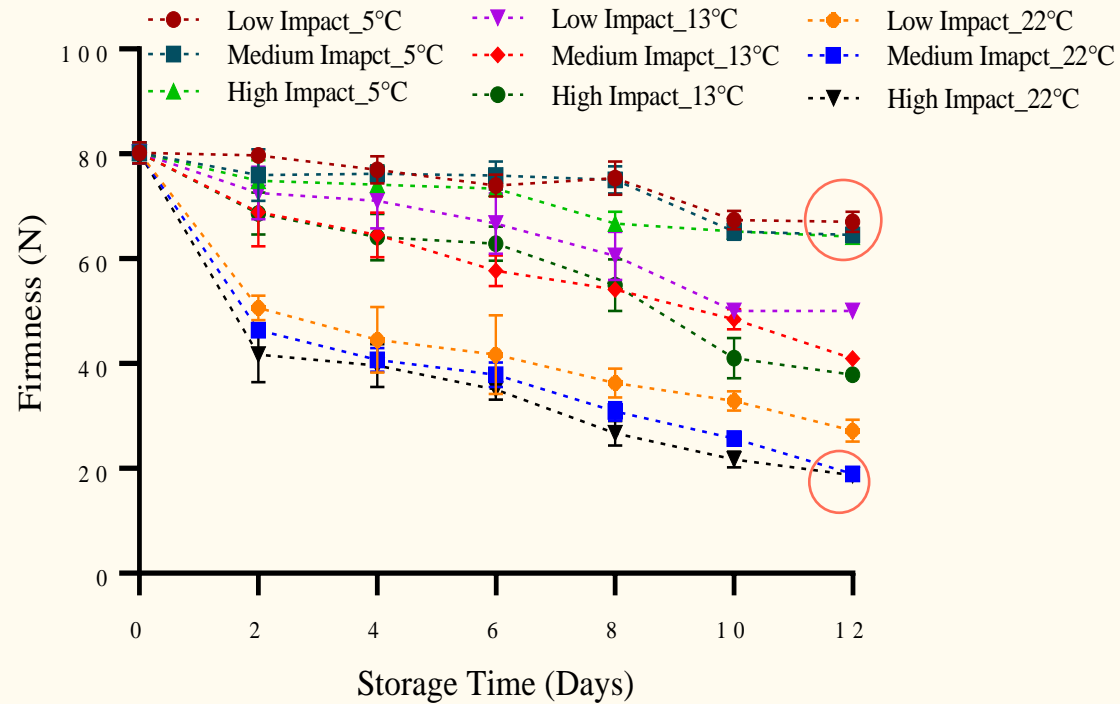

**Figure 3.** Firmness (N) of banana fruit bruised at low, medium, and high impact energy levels and stored 5°C, 13°C and 22°C storage conditions for 12 days. Error bars represent standard deviation (SD) of the mean values  $\pm$ S.D. of 6 replicates.

Firmness

TRm

WL%

a\*

L\*

# Results and Discussion Cont.

## Lightness ( $L^*$ )

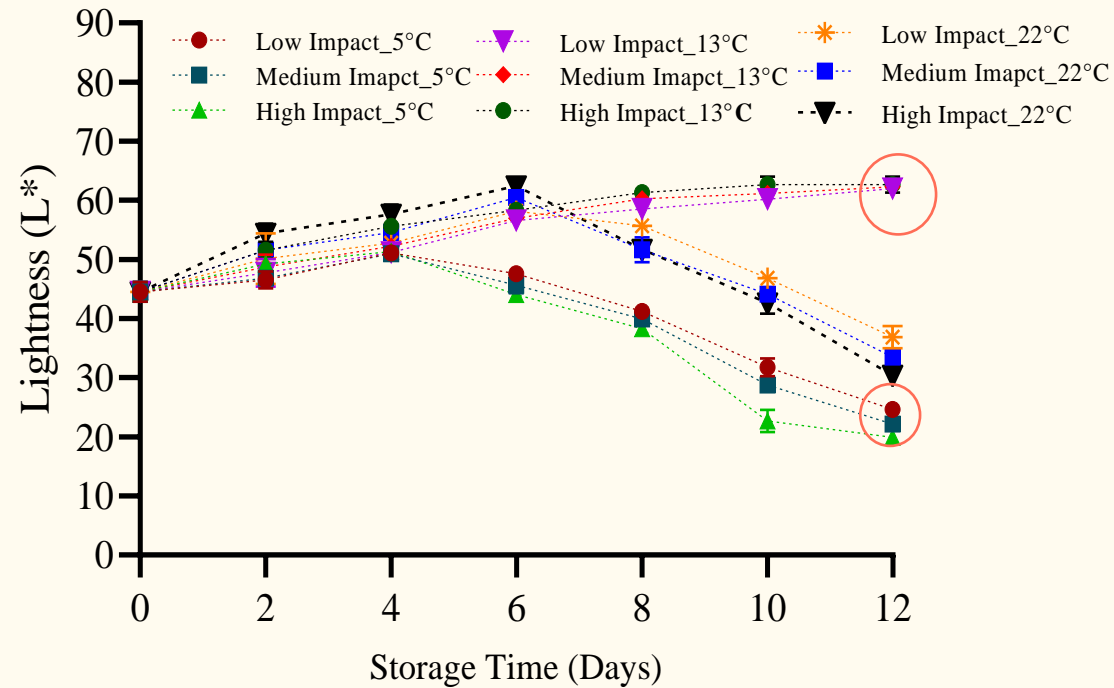

**Figure 4.** Lightness ( $L^*$ ) of banana fruit bruised at low, medium, and high impact energy levels and stored 5°C, 13°C and 22°C storage conditions for 12 days. Error bars represent standard deviation (SD) of the mean values  $\pm$ S.D. of 15 readings of 3 replicates.

$L^*$

Firmness

TRm

WL%



# Results and Discussion Cont.

## Redness & greenness ( $a^*$ )

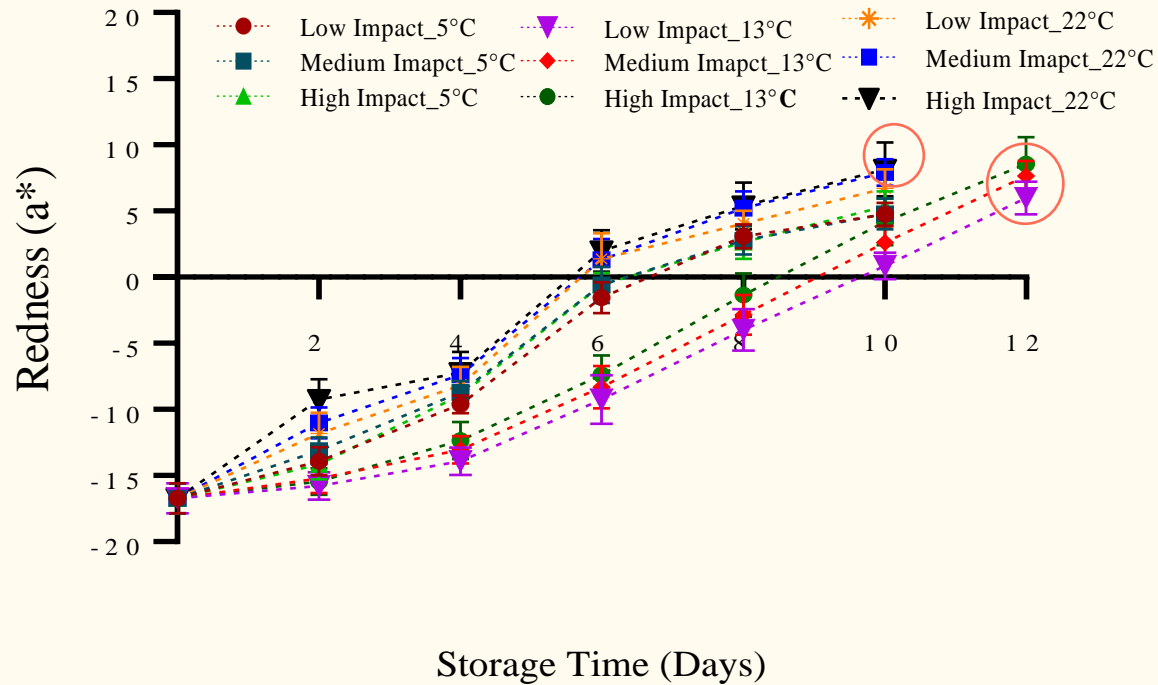

**Figure 5.** Redness & greenness ( $a^*$ ) of banana fruit bruised at low, medium, and high impact energy levels and stored 5°C, 13°C and 22°C storage conditions for 12 days. Error bars represent standard deviation (SD) of the mean values  $\pm$ S.D. of 15 readings of 3 replicates.

$a^*$

$L^*$

Firmness

TRm

WL%

# Conclusions & Recommendations

---

**01**

Mechanical damage like bruising induced the occurrence of weight loss reduction and color lightness changes over time, particularly at 22°C.

**03**

Storage at 13°C reduced the appearance of severe damages of bruising in banana fruits.

**02**

The firmness of bruised banana fruits reduced as storage temperature and impact level increased during experimental days.

**04**

Increment of transpiration rate was kindly associated with both storage temperature and bruising.

# Conclusions & Recommendations

---

## Bruise Susceptibility Studies

Very helpful in preventing damage during handling operations.

01

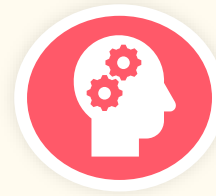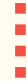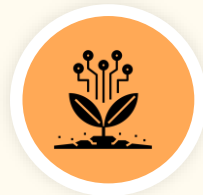

02

## Instrumented Sphere Technologies

Permit real-time monitoring and evaluation of packing lines to identify critical control points.

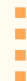

## Labour Training

- Handle the crop gently.
- Harvesting at proper maturity.
- Installing padding inside bulk bins.
- Avoiding over or under-packing of containers.

03

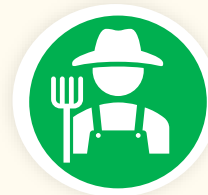

# Acknowledgments

---

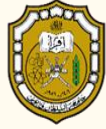

جامعة السلطان قابوس  
Sultan Qaboos University

## Sultan Qaboos University internal grant

Projects Code:

- IG/AGR/SWAE/19/03
- IG/AGR/Dean/ 18/01

# References

---

- 01.** Fadiji, T.; Coetzee, C.; Chen, L.; Chukwu, O.; Opara, U.L. Susceptibility of apples to bruising inside ventilated corrugated paperboard packages during simulated transport damage. *Postharvest Biol. Technol.* **2016**, *118*, 111–119.
- 02.** Htike, T; Saengrayap, R; Aunsri, N; Tontiwattanakul, K; Chaiwong, S. Investigation and Evaluation of Impact Bruising in Guava Using Image Processing and Response Surface Methodology, *Horticulturae*, **2021**, *7*, 411.
- 03.** Opara, U.L; Pathare, P.B. Bruise damage measurement and analysis of fresh horticultural produce—a review, *Postharvest Bio. Technol.*, **2014**, *91*, 9-24.
- 04.** Pathare, P.B.; Al-Dairi, M. Bruise Susceptibility and Impact on Quality Parameters of Pears During Storage. *Front. Sustain. Food Syst.* **2021**, *5*, 658132.
- 05.** Wasala, C.B; Dissanayake, C; Dharmasena, D; Gunawardane, C; Dissanayake, T. Postharvest losses, current issues and demand for postharvest technologies for loss management in the main banana supply chains in Sri Lanka, *J. Postharvest Technol.* **2014**, *2*, 80-87.

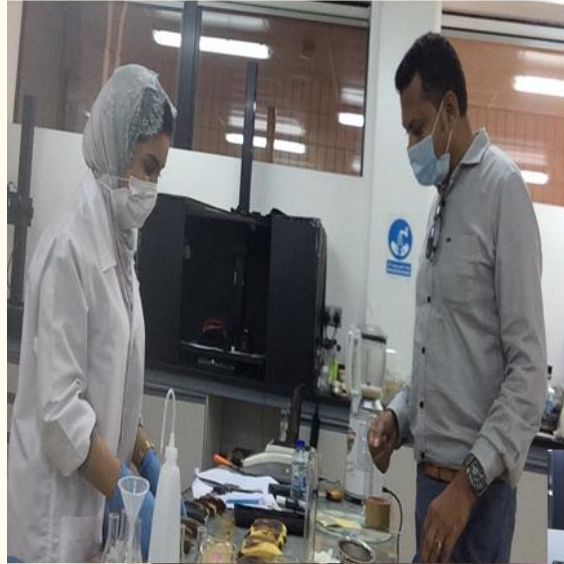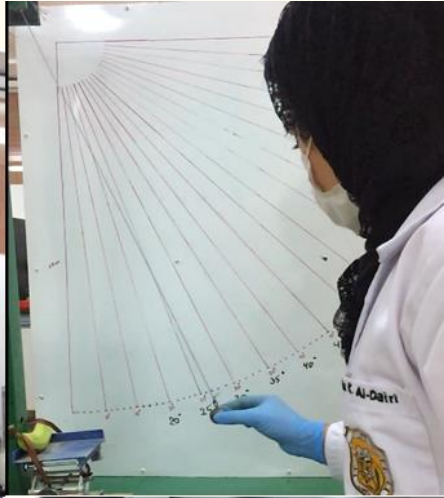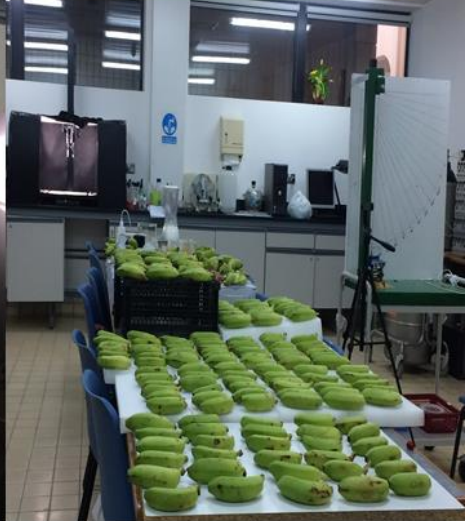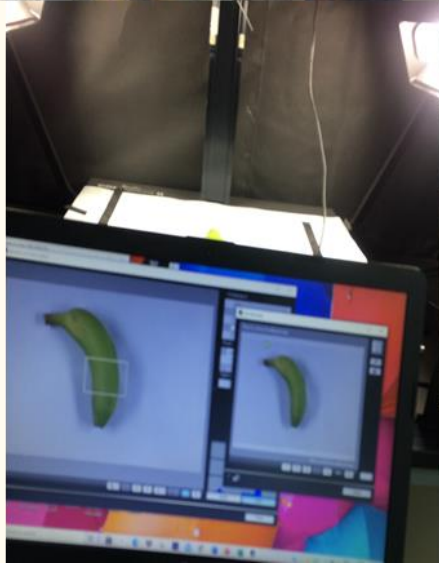

**Thank  
You**

---
